# Supplementary material
Source: PubMed Central journal article supplement (PMC9874048)
Supplement: mmc1.pdf [file mmc1.pdf]

## Appendix 1. The Behavioral and Social Drivers (BeSD) of Vaccination Framework

### Behavioral and Social Drivers of COVID-19 Vaccination in the United States, August–November 2021

Kimberly E. Bonner, PhD, Kushagra Vashist, MPH, Neetu S. Abad, PhD, Jennifer L. Kriss, PhD, Lu Meng, PhD, James T. Lee, MD, Elisabeth Wilhelm, MS, Peng-Jun Lu, MD, Rosalind J. Carter, PhD, Kwanza Boone, PhD, Brittney Baack, MPH, Nina B. Masters, PhD, Debora Weiss, PhD, Carla Black, PhD, Qian Huang, PhD, Sitaram Vangala, MS, Christina Albertin, MSPH, Peter G. Szilagyi, MD, Noel T. Brewer, PhD, James A. Singleton, PhD

American Journal of Preventive Medicine

### Appendix 1. The Behavioral and Social Drivers (BeSD) of Vaccination Framework

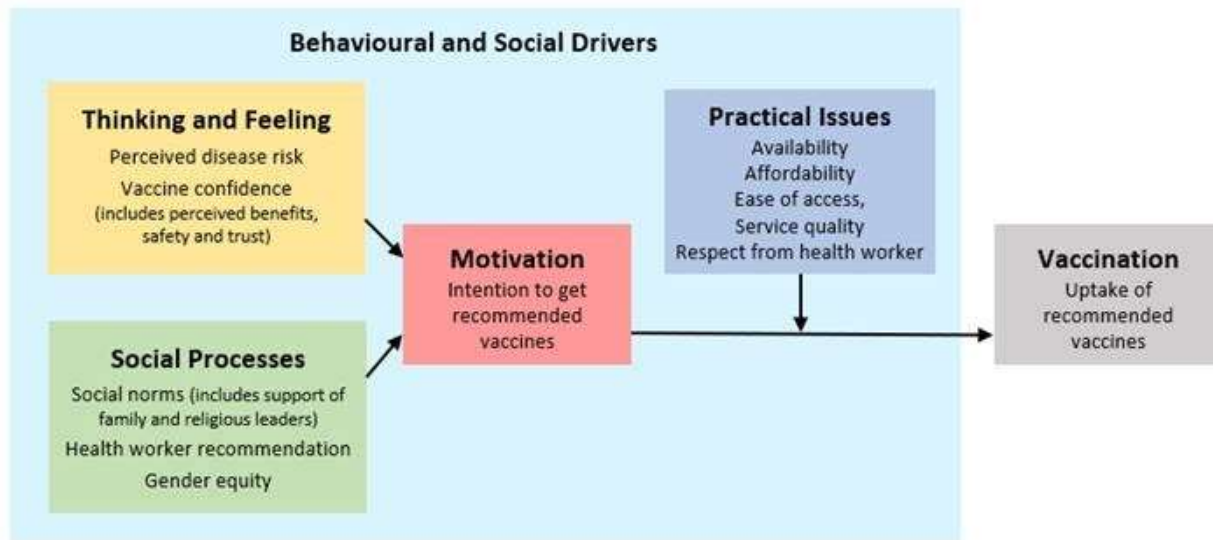

**The Behavioural and Social Drivers (BeSD) Framework.** Source: The WHO BeSD working group. Based on Increasing Vaccination Model (Brewer et al., 2017). Reprinted with permission from WHO.
